# Supplementary material
Source: publisher figshare collection journal article supplement (https://acs.figshare.com/ndownloader/files/25729633)
Supplement: Supplementary file 1 [file 25729633]

Figure S1

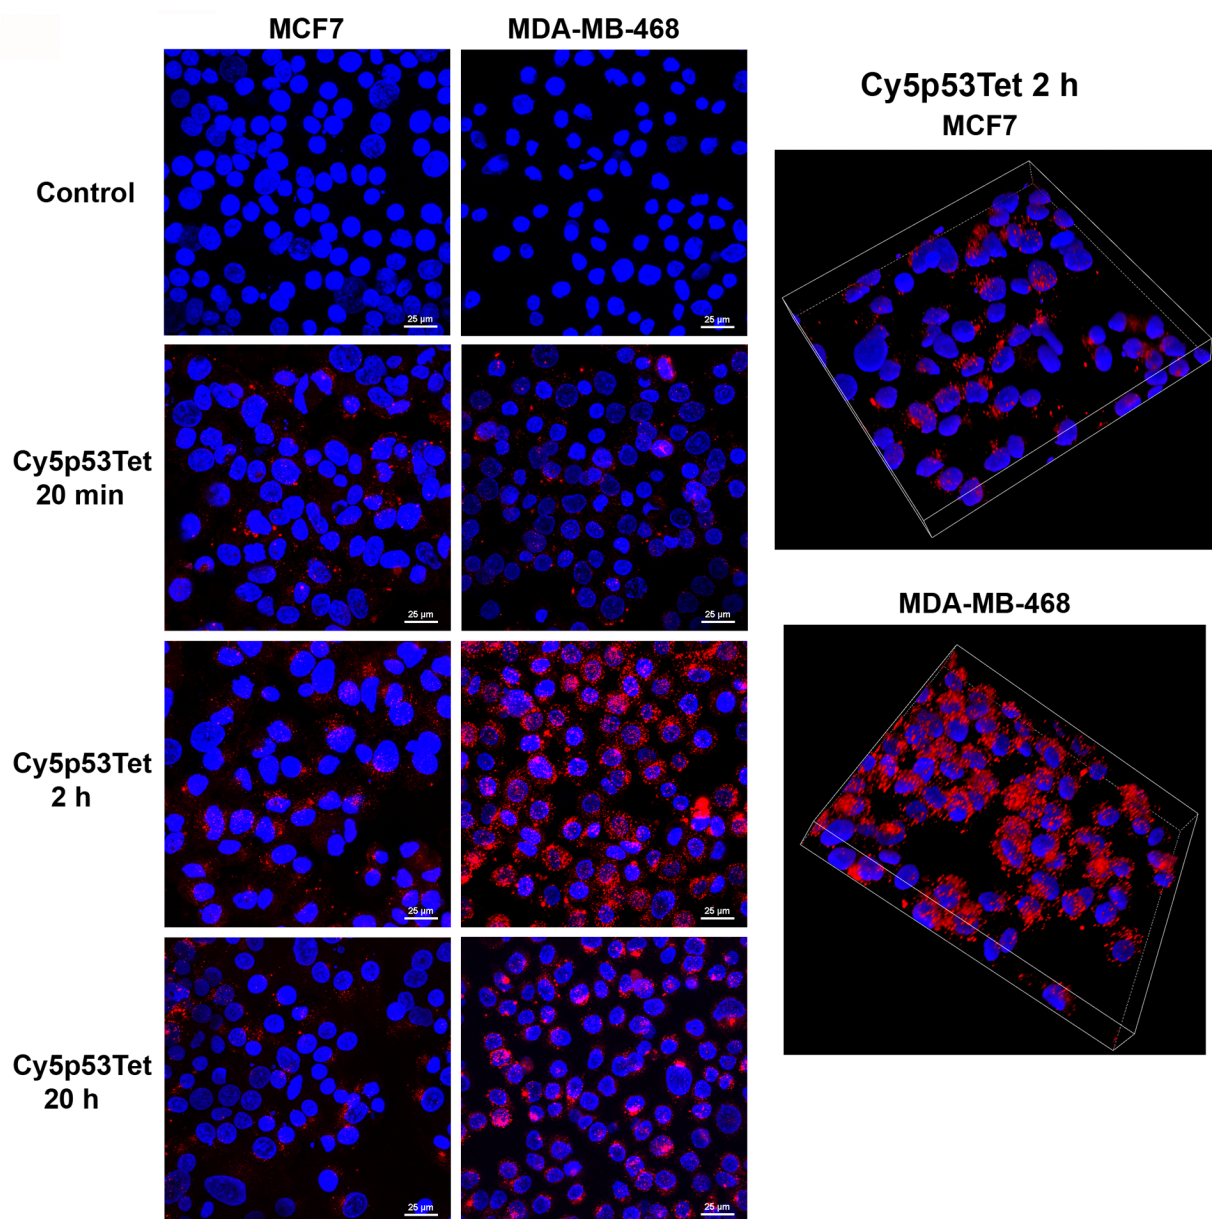

**Figure S1. Higher uptake of Cy5p53Tet in MDA-MB-468 TNBC cells than in ER-positive MCF7 cells.** Live cell imaging staining of MCF7 and MDA-MB-468 cells after 20 min, 2 h, and 20 h of incubation with 500 nM Cy5p53Tet (red). Hoechst staining (blue) was used to stain the nucleus. 3D model of Cy5p53Tet staining in MCF7 and MDA-MB-468 cells at 2 h generated by Nikon Elements software.

Figure S2

shp53 Induction

-

+

Control

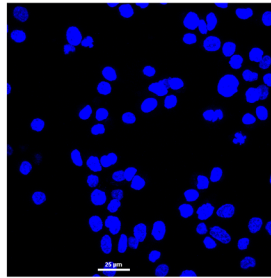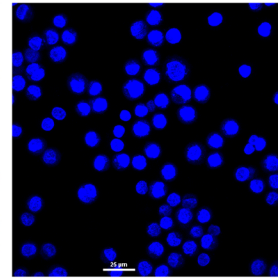

Cy5p53Tet  
30 min

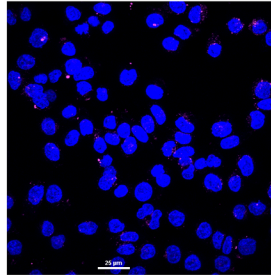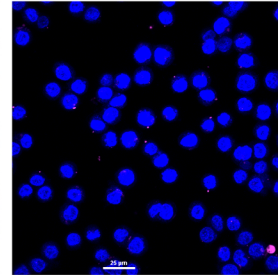

Cy5p53Tet  
2 h

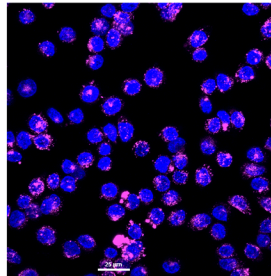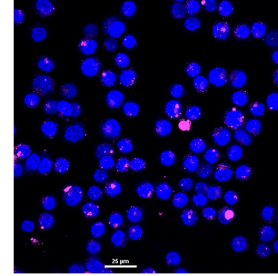

Cy5p53Tet  
4 h

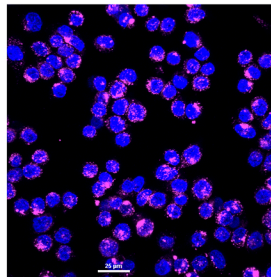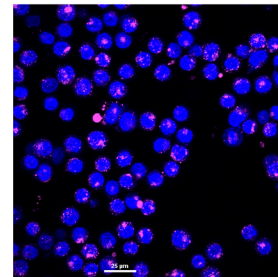

Cy5p53Tet  
24 h

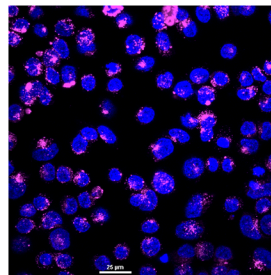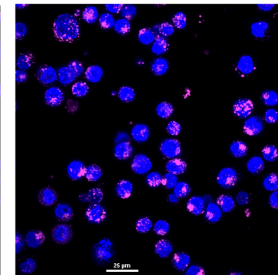

**Figure S2. Cy5p53Tet signal reduction upon the depletion of mtp53 R273H.** Live cell imaging staining of MDA-MB-468 shp53 cells after 30 min, 2 h, 4 h, or 24 h of incubation with 500 nM Cy5p53Tet (red). Hoechst staining (blue) was used to stain the nucleus.

Figure S3

shp53 Induction

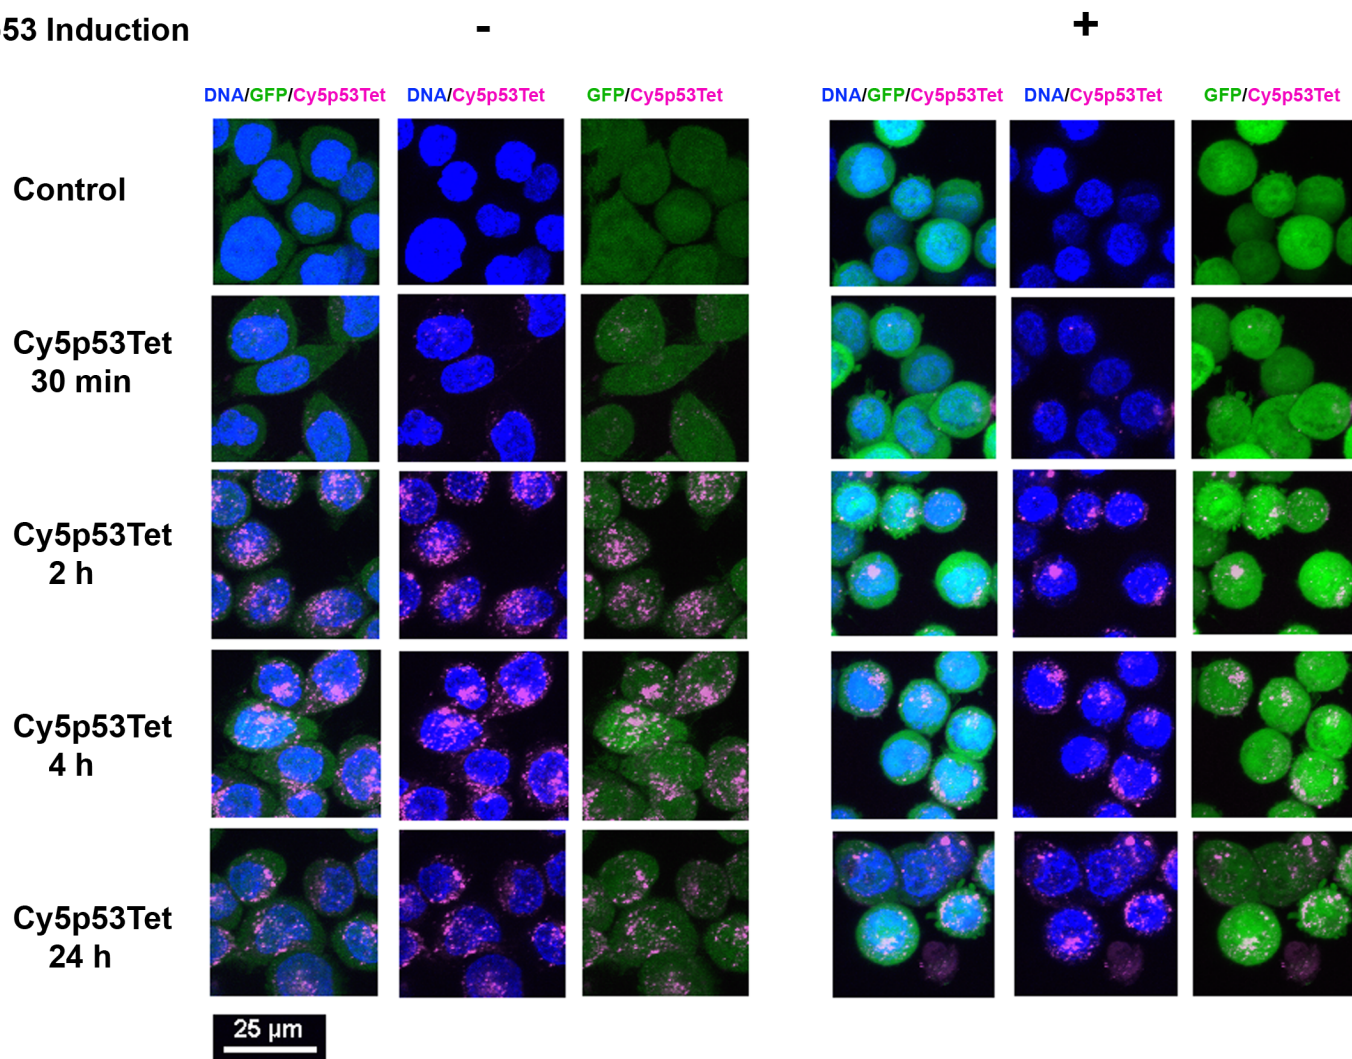

**Figure S3. Nuclear penetration of Cy5p53Tet in TNBC.** Live cell imaging of Cy5p53Tet (red) in MDA-MB-468 shp53 cells with or without shRNA induction. Cells were imaged by confocal microscopy after 30 min, 2 h, 4 h and 24 h incubation of 500 nM Cy5p53Tet. Hoechst staining (blue) was used to stain the nucleus and GFP (green) was an indicator of cytoplasm and doxycycline-mediated induction. Three independent experiments with biological replicate were performed.



Figure S4

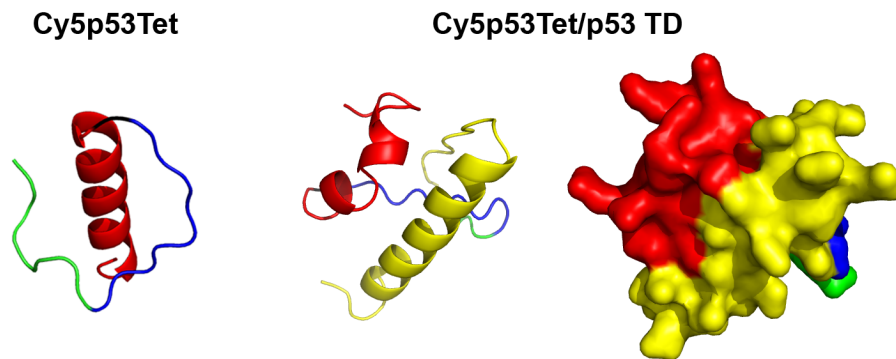

**Figure S4. Prediction of p53TD and Cy5p53Tet complex by the protein–peptide globe docking method CABS-dock.** (Left) Cy5p53Tet peptide structure model was generated using RPBS Mobyle portal PEP-FOLD [1, 2]. (Right) Cartoon representations of the Cy5p53Tet. Cy5p53Tet-p53TD complex built by CABS-dock [3]. Secondary structure were demonstrated and colored: HIV-1 TAT (green), p53TD  $\beta$  strand (blue) and p53TD  $\alpha$  helix (red), p53TD (yellow). The analysis by CABS-dock simulation runs, using a ligand RMSD cutoff of 5.5 Angstrom, elicited a top-scored model of p53TD-Cy5p53Tet complex (average RMSD=1.63) that represents a high-quality prediction. The best docking model was displayed by PyMOL.

[1] C. Alland, F. Moreews, D. Boens, M. Carpentier, S. Chiusa, M. Lonquety, N. Renault, Y. Wong, H. Cantalloube, J. Chomilier, J. Hochez, J. Pothier, B.O. Villoutreix, J.F. Zagury, P. Tufféry, RPBS: a web resource for structural bioinformatics, *Nucleic acids research*, 33 (2005) W44-49.

[2] A. Lamiabie, P. Thevenet, J. Rey, M. Vavrusa, P. Derreumaux, P. Tuffery, PEP-FOLD3: faster de novo structure prediction for linear peptides in solution and in complex, *Nucleic acids research*, 44 (2016) W449-454.

[3] M. Kurcinski, M. Jamroz, M. Błaszczyk, A. Kolinski, S. Kmiecik, CABS-dock web server for the flexible docking of peptides to proteins without prior knowledge of the binding site, *Nucleic acids research*, 43 (2015) W419-424.



Figure S5

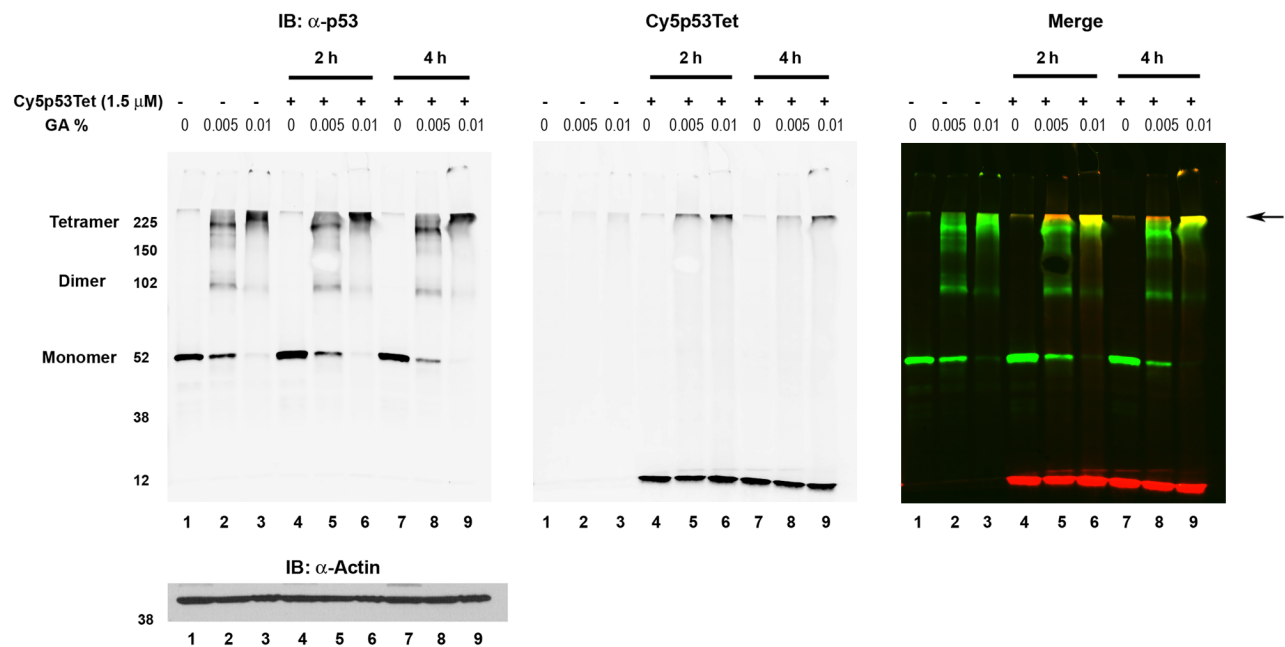

**Figure S5. Glutaraldehyde cross-link assay validated Cy5p53Tet binding to tetrameric mtp53 R273H.** MDA-MB-468 cells incubated with 1.5  $\mu$ M Cy5p53Tet for 2 or 4 h and 100  $\mu$ g of cell lysates were treated with increasing amounts of glutaraldehyde (0, 0.005% and 0.01%) for 20 min at room temperature. Western blot was carried out to detect mtp53 oligomer using anti-p53 antibody (left panel). Cy5p53Tet signal was detected using the Cy5 channel (middle panel). Merged mtp53 (green) and Cy5p53Tet (red) image suggest that a high molecular weight signal (yellow, indicate with arrow) was a mtp53/Cy5p53Tet complex (right panel).

Figure S6

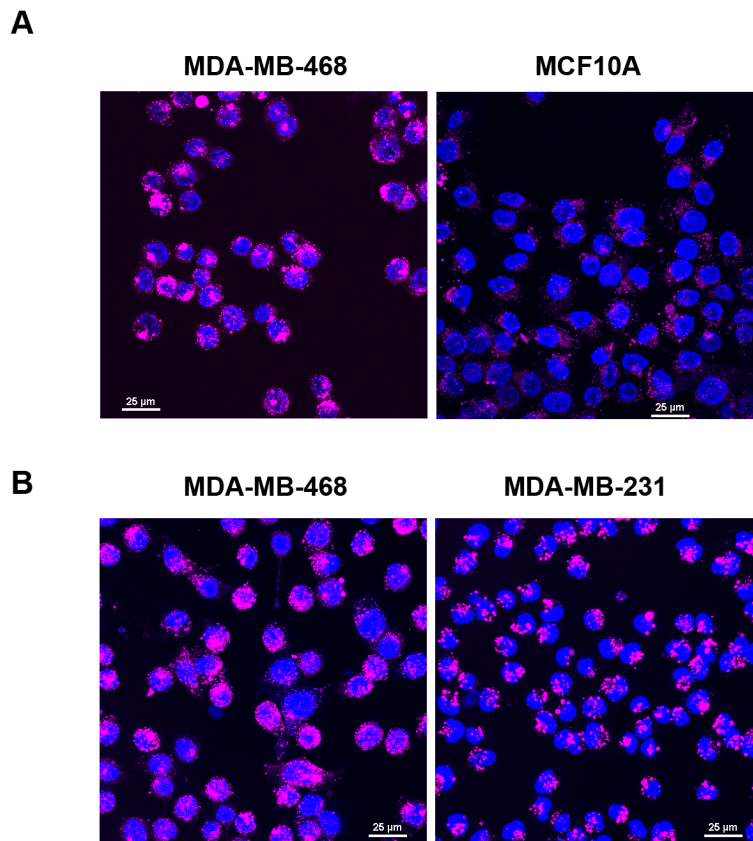

**Figure S6. Different intracellular distributions of the Cy5p53Tet between TNBC and normal mammary epithelial cells. (A)** Live cell imaging staining of TNBC MDA-MB-468 cells and normal mammary epithelial MCF10A cells after 3 h of incubation with 500 nM Cy5p53Tet (red). **(B)** Live cell imaging staining of TNBC MDA-MB-231 and MDA-MB-468 cells after 2 h of incubation with 500 nM Cy5p53Tet (red). Hoechst staining (blue) was used to stain the nucleus.

Figure S7

A

12 min post Cy5p53Tet injection

MDA-MB-468

MCF7

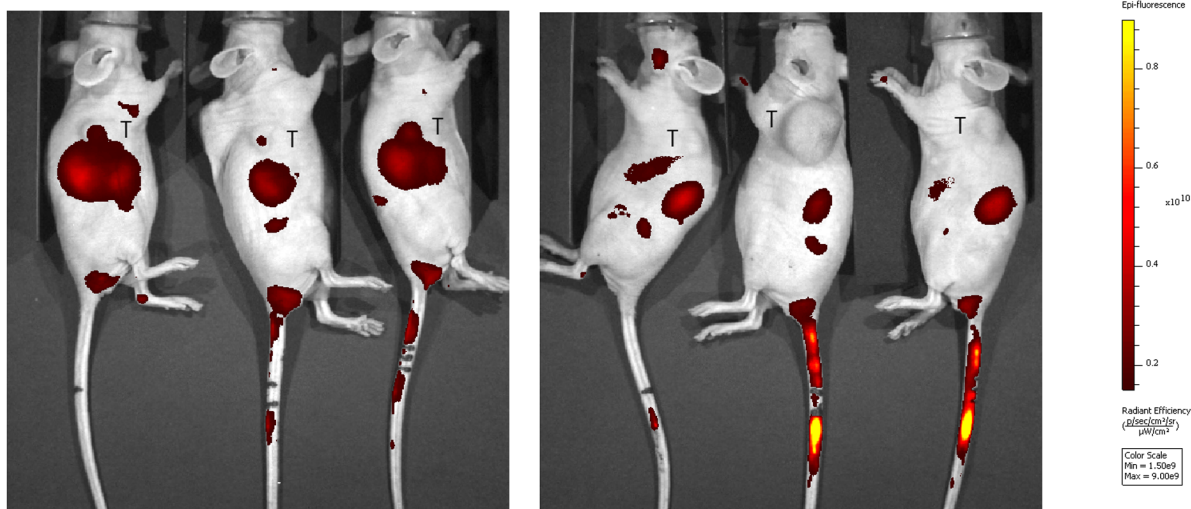

B

40 min post Cy5p53Tet injection

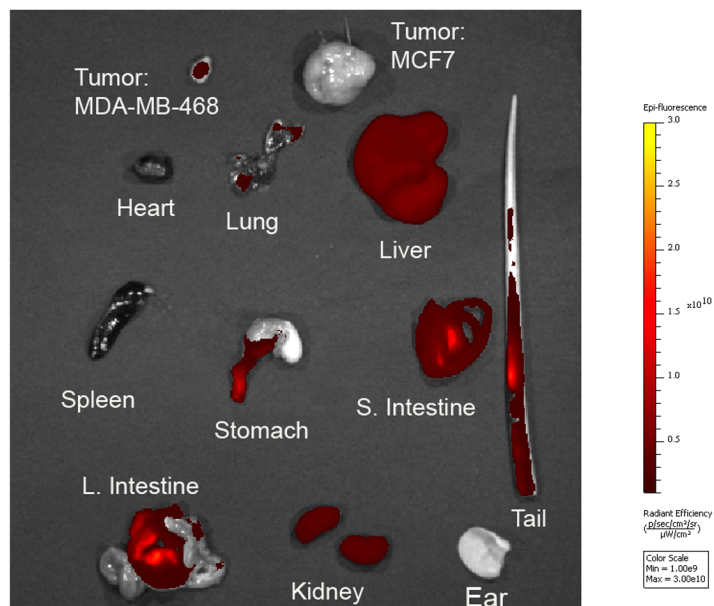

**Figure S7. Cy5p53Tet signal in whole animal and healthy organs. (A)** *In vivo* NIRF imaging of Cy5p53Tet uptake in mice bearing bilateral MCF7 and MDA-MB-468 xenograft models. Image acquired 12 min post-injection is shown. The tumor is marked by a “T”. **(B)** *Ex vivo* NIRF imaging of Cy5p53Tet uptake in MDA-MB-468 and MCF7 tumors and organs. Image acquired 40 min post-injection is shown.
